# Supplementary material
Source: PubMed Central journal article supplement (PMC3262119)
Supplement: NIHMS346990-supplement-1_si_001.pdf [file NIHMS346990-supplement-1_si_001.pdf]

Supporting Online Material for *Membrane Assembly Driven by a Biomimetic  
Coupling Reaction*

Itay Budin, Neal K. Devaraj

This file includes: Methods, Figures S1-3, Movie S1, References

## Methods

### Synthesis of alkyne lysolipid (3-(palmitoyloxy)-2-(pent-4-ynoyloxy)propyl (2-(trimethylammonio)ethyl) phosphate)

70 mg of 1-palmitoyl-2-hydroxy-*sn*-glycero-3-phosphocholine (Avanti) was dissolved in 10 mL methylene chloride. To this, 70 mg of 4-pentynoic acid, 140 mg of 1,3-diisopropylcarbodiimide and 25 mg of 4-(dimethylamino)pyridine was added. The solution was stirred overnight, filtered and the solvent removed by rotary evaporation. The product was isolated by column chromatography (CHCl<sub>3</sub>/MeOH/H<sub>2</sub>O) as a white solid. Yield 70%. <sup>1</sup>HNMR (400 MHz CDCl<sub>3</sub>): δ 5.25-5.2 (m, 1H), 4.4-4.3 (m, 3H), 4.2-4.1 (m, 2H), 4.05-4.0 (m, 1H) 3.95-3.9 (m, 2H), 3.4 (s, 9H), 2.6-2.4 (m, 4H), 2.35-2.25 (t, 2H), 2.05 (t, 1H), 1.6-1.5 (m, 2H), 1.35-1.2 (m, 24H), 0.9-0.8 (t, 3H). [M+H]<sup>+</sup> calculated mass: 576.36; found mass: 576.48.

### Synthesis of oleyl azide ((*Z*)-1-azidooctadec-9-ene)

Oleyl azide was synthesized using an adaptation of a previously reported procedure(1). 150 mg of oleyl bromide (*Z*)-1-bromooctadec-9-ene (Sigma) was dissolved in 1 mL anhydrous dimethylformamide and reacted overnight under nitrogen at 85°C with 100 mg sodium azide. After the reaction, 5 mL water was added and the organic phase extracted using methylene chloride. After drying with MgSO<sub>4</sub>, the solvent was removed by rotary evaporation and the product isolated by column chromatography as a pale yellow oil. Yield 80%. <sup>1</sup>HNMR (400 MHz CDCl<sub>3</sub>): δ 5.4-5.3 (m, 2H), 3.3-3.2 (t, 2H), 2.1-1.95 (m, 4H), 1.7-1.5 (m, 2H) 1.4-1.2 (m, 22H), 0.9 (t, 3H).

### Synthesis of triazole phospholipid ((*Z*)-3-(heptadecanoyloxy)-2-((3-(1-(octadec-9-en-1-yl)-1*H*-1,2,3-triazol-4-yl)propanoyl)oxy)propyl (2-(trimethylammonio)ethyl) phosphate)

13 mg of oleyl azide and 24 mg of alkyne lipid were dissolved in 2:1 dimethylformamide:water and stirred for 48 hours in the presence of a copper wire. The solvent was evaporated and the resulting triazole isolated by column chromatography as a white powder. Yield 65%. <sup>1</sup>HNMR (400 MHz CDCl<sub>3</sub>): δ 7.5 (s, 1H), 5.4-5.3 (m, 2H)

5.25-5.2 (m, 1H), 4.5-4.25 (m, 5H), 4.2-4.1 (m, 1H), 4.05-4.0 (m, 2H) 3.9-3.8 (m, 2H), 3.4 (s, 9H), 3 (m, 2H), 2.8-2.7 (m, 2H), 2.6-1.0 (56H), 0.9-0.8 (t, 6H). [M+H]<sup>+</sup> calc mass 869.64 found mass 869.73

### **Membrane Assembly**

To 100  $\mu$ L of either distilled water or appropriate buffer, 0.15 mg of oleyl azide and 0.3 mg alkyne phospholipid were added followed by 0.1 mg of sodium ascorbate and 6  $\mu$ g of copper sulfate. The mixture was agitated overnight. Control experiments were prepared identically with the absence of copper catalyst.

### **Encapsulation Experiments**

A 1 mM solution of 8-Hydroxypyrene-1,3,6-trisulfonic acid (HPTS) was made in 10 mM HEPES buffer. This solution was then used as the buffer for membrane assembly as described above. After overnight agitation, a vesicle sample was diluted 10 fold in buffer and observed using fluorescence microscopy (Figure S1A). Alternatively, the reaction mixture was separated via size exclusion chromatography (Sephacrose 4B) and a fraction collector (Gilson). HPTS fluorescence (excitation 460 nm, emission 510 nm) was measured using a plate reader (Figure S1B, green). A control experiment lacking the copper catalyst was run similarly (Figure S1B, blue).

### **LC-MS of product formation**

Membrane assembly was performed in distilled water as described above. A 5  $\mu$ L sample was taken at various time points before and after addition of copper catalyst. This sample was diluted with 20  $\mu$ L acetonitrile and analyzed using an analytical LC/MS with an Evaporative Light Scattering Detector from Waters Co. (Milford, MA), operated by Fractionlynx 4.0 or Masslynx software with Waters Xterra columns (C8) at a flow rate of 0.3 mL/min. For all LC/MS runs, solvent A consisted of water with 0.1% formic acid and solvent B of acetonitrile with 0.1% formic acid.

### **Anisotropy Measurements**

Diphenylhexatriene (5  $\mu\text{M}$  final concentration) was added to 100 nm extruded vesicles (2 mM phospholipid) as a 1% vol/vol concentrated ethanol stock, followed by an overnight incubation. Steady-state anisotropy was measured on a Cary Eclipse (Varian) spectrophotometer with a manual polarizer accessory and peltier temperature controller. Anisotropy (R) was calculated as a unit-less ratio (2) defined as  $(I_{\parallel} - I_{\perp}) / (I_{\parallel} + 2 \cdot I_{\perp})$ , where  $I_{\parallel}$  and  $I_{\perp}$  are the emission intensities at 430 nm (excitation 360 nm) parallel and perpendicular, respectively, to the direction of polarization of the excitation source. Measurements were taken at 23 °C, unless otherwise noted

### **Lipid Solubility Measurements**

Serial dilutions of the given lipid were prepared and and tumbled overnight. Surface tensions of the solutions was measured by the Du Noüy ring method on a Model 20 (Fisher) surface tensiometer. Critical micelle concentrations (CMC) were extrapolated from the concentrations at which the surface tension plateaus.

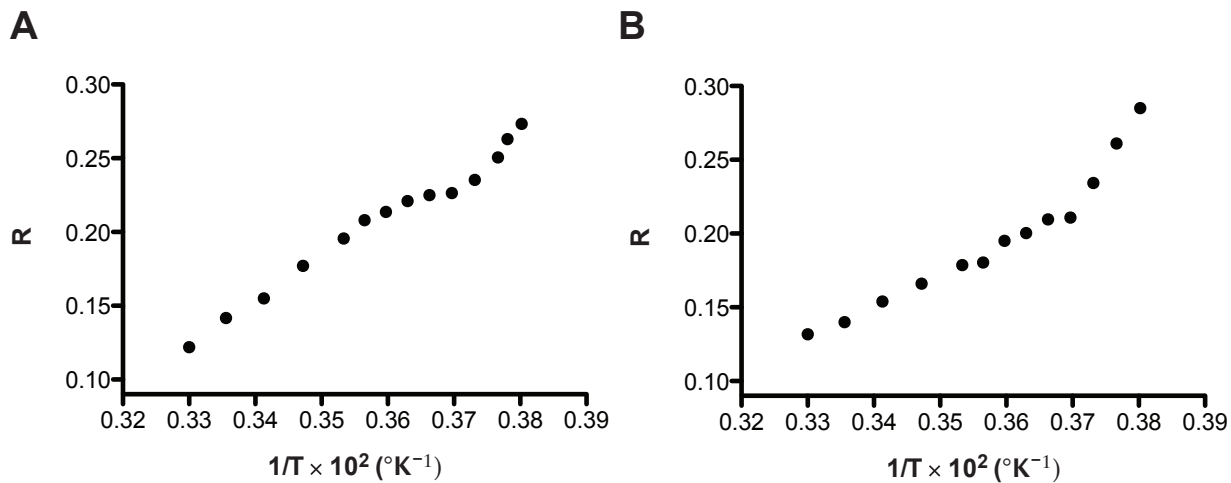

**Figure S1.** Chain melting temperature of triazole phospholipid. A) DPH anisotropy as a function of temperature was used to measure phase transitions of the lipid chains in triazole phospholipid vesicles as previously demonstrated (3). A sudden change in the slope of the anisotropy at 270 K indicates a transition from a gel to liquid-crystalline phase. B) The melting temperature of the lipid chains in POPC membranes was detected at 270 K, consistent with previous measurements (4).

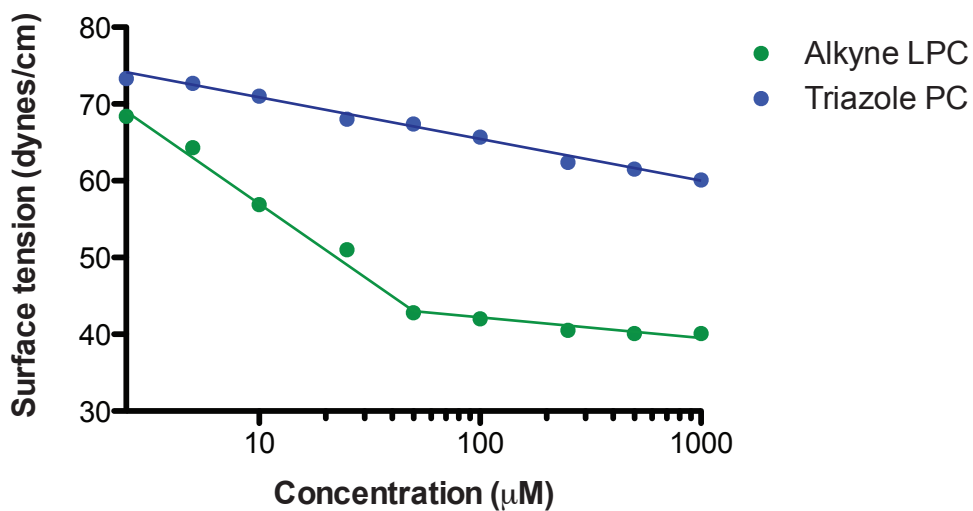

**Figure S2.** Aqueous solubilities of alkyne substrate and triazole product. Surface tension measurements were used to detect monomer to aggregate phase transitions. The alkyne lysolipid substrate (green) features a CMC of  $\sim 50 \mu\text{M}$ , consistent with that of other lysolipids (5). The triazole product (blue) does not show a concentration-dependent aggregation because of the extremely low (nM) solubility of diacyl phospholipids.

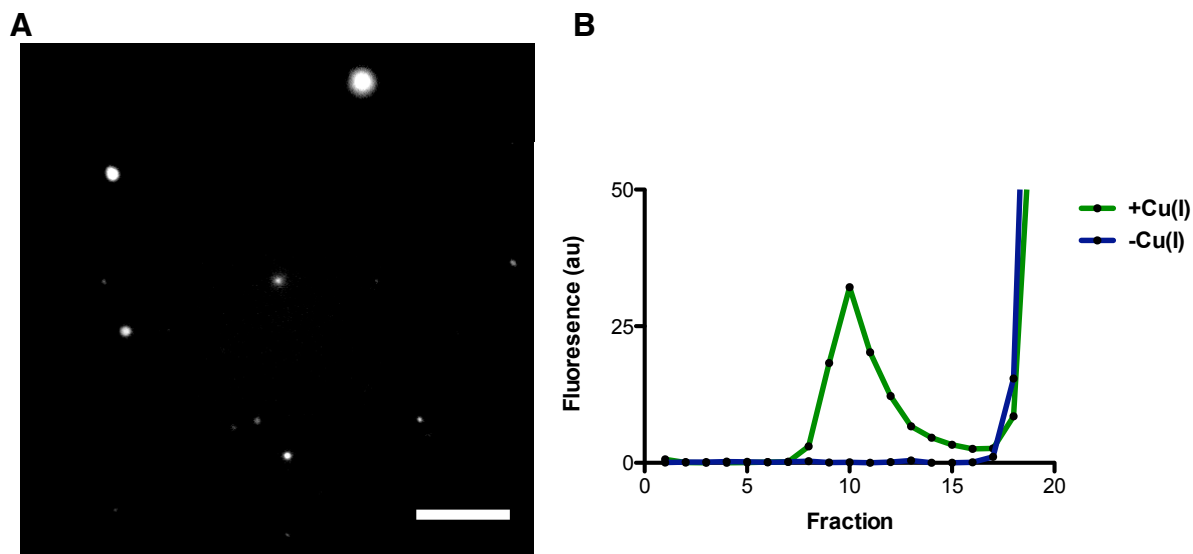

**Figure S3.** Encapsulation of polar fluorescent dye (8-Hydroxypyrene-1,3,6-trisulfonic acid) in triazole phospholipid membrane vesicles. A) Fluorescence microscopy of dye encapsulated in vesicles formed during copper-catalyzed reaction. Scale bar denotes 15  $\mu\text{m}$ . B) fluorescence intensity versus collected fraction after size-exclusion chromatography of vesicles formed in the presence (green line) and absence (blue line) of the copper catalyst. All experiments were performed in 10 mM HEPES buffer.

**Movie S1.** Time lapse fluorescence microscopy of membrane formation. Copper catalyst (0.25 mM) was added to an aqueous emulsion of oleyl azide (5 mM) and alkyne lysolipid (5 mM) along with a membrane staining dye (Rh-DHPE, 2  $\mu\text{M}$ ). Sequential fluorescence images were taken near a non-fluorescent azide oil droplet (upper left) over a period of 3.5 minutes.

## References

1. J. P. Collman, N. K. Devaraj, C. E. Chidsey, *Langmuir* **20**, 1051 (2004).
2. W. J. Van Blitterswijk, R. P. Van Hoeven, B. W. Van der Meer, *Biochim Biophys Acta* **644**, 323 (1981).
3. B. R. Lentz, Y. Barenholz, and T. E. Thompson, *Biochemistry* **15**, 4521 (1976).
4. B. J. Litman, E. N. Lewis, and I. W. Levin, *Biochemistry* **30**, 313 (1990).
5. R. E. Stafford, T. Fanni, E. A. Dennis, *Biochemistry* **27**, 5113 (1989).
